# Supplementary material
Source: PubMed Central journal article supplement (PMC6453704)
Supplement: NIHMS1514755-supplement-1.pdf [file NIHMS1514755-supplement-1.pdf]

**Supplemental Table:** Summary of studies reporting on the association between measures of stress and hair cortisol concentrations (HCC) during pregnancy.

| Last name, Year         | Sample size (N), Recruitment, Age                                                         | Scalp hair collection, Laboratory analysis                                                                                          | Stress scale, Time of assessment                                                                                                                                                                            | Main findings                                                                                                                                                                                                                                                                                                                      |
|-------------------------|-------------------------------------------------------------------------------------------|-------------------------------------------------------------------------------------------------------------------------------------|-------------------------------------------------------------------------------------------------------------------------------------------------------------------------------------------------------------|------------------------------------------------------------------------------------------------------------------------------------------------------------------------------------------------------------------------------------------------------------------------------------------------------------------------------------|
| Scharlau, 2017          | N=45, Public advertisements and gynecologists' offices in Germany, ages ≤40               | 1cm in the 2 <sup>nd</sup> and 3 <sup>rd</sup> trimester, Liquid chromatography                                                     | Depression using 9-item PHQ (past 2 weeks), stress, and somatization using the 15-item PHQ (past 4 weeks), 2 <sup>nd</sup> and 3 <sup>rd</sup> trimester                                                    | No association between HCC and depression, stress, or somatization scores (magnitudes of association not reported). However, negative correlations with hair cortisone and its ratio to cortisol were found (Pearson correlation coefficients -0.49 to -0.31, p-values <0.04).                                                     |
| Caparros-Gonzalez, 2017 | N=44, Prenatal visits in Spain, mean age=32                                               | ≤3cm in each trimester and postpartum, immunoassay                                                                                  | Depression using the EPDS (past 7 days) continuous score and using a cutoff of 10, mean=16 days after birth                                                                                                 | HCC higher comparing those with postpartum depression to those without at all trimester, p-values <0.05 for 1 <sup>st</sup> and 3 <sup>rd</sup> trimester. In linear regression models 1 <sup>st</sup> and 3 <sup>rd</sup> trimester HCC predicted EPDS scores (Betas were 0.32, p<0.05).                                          |
| Wilkenius, 2016         | N=181, Prenatal visits in Norway, mean age=30                                             | 1cm in the 2 <sup>nd</sup> trimester, immunoassay                                                                                   | Depression using the EPDS (past 7 days) continuous score, 2 <sup>nd</sup> trimester                                                                                                                         | HCC and depression scores were not correlated (Pearson correlation coefficient=0.1, p-value not reported), nor were they associated in multivariable linear regression models (Beta not reported, p=0.38).                                                                                                                         |
| Hoffman, 2016           | N=90, Prenatal visits in USA, mean ages for term and preterm deliveries were 28 and 32    | 3cm hair segments in each trimester, immunoassay                                                                                    | 14-item perceived stress using the PSS scale, Depression using the CES-D, and anxiety using the STAI-S, each trimester                                                                                      | Education and socioeconomic status were not associated with HCC (p-values >0.05, magnitudes of association not reported). An analysis of 45 correlations found correlations between PSS and 1 <sup>st</sup> and 2 <sup>nd</sup> HCC, CES-D and all trimesters, and STAI-S with the 2 <sup>nd</sup> and 3 <sup>rd</sup> trimesters. |
| Braig, 2015             | N=768, During hospital stay after delivery in Germany, ages 18+                           | 3cm from scalp reflecting the 3 <sup>rd</sup> trimester, HPLC-MS/MS                                                                 | Chronic stress using the SSCS-TICS (past 3 months) included employment and social burdens, anxiety using the PRAQ-R (time window not reported), and anxiety and depression using HADS subscales (past week) | Stress measures did not correlate with HCC (Spearman correlation coefficient's ranged from 0.0-0.1, p-values >0.06), and no associations were observed in multivariable regression analyses                                                                                                                                        |
| Kalra, 2007             | N=25, Callers requesting medication safety information in Canada, (age range 18-45 years) | 1-1.5cm scalp hair collected in the end of the 1 <sup>st</sup> trimester or beginning of the 2 <sup>nd</sup> trimester, immunoassay | Perceived stress using the 10-item PSS scale assessed at the end of the 1 <sup>st</sup> trimester or beginning of the 2 <sup>nd</sup> trimester                                                             | HCC and PSS scores were correlated (Spearman correlation coefficient= 0.47, p<0.05)                                                                                                                                                                                                                                                |

**Abbreviations:** SD= standard deviation, cm= centimeter, HPLC-MS/MS= high performance liquid chromatography with tandem mass spectrometry, PHQ= Patient Health Questionnaire, EPDS= Edinburgh Postnatal Depression Scale, PSS= Perceived Stress Scale, CES-D= Center for Epidemiologic Studies-Depression Scale, STAI-S= State-Trait-Anxiety Inventory, SSCS-TICS= screening scale of the Trier Inventory of Chronic Stress, PRAQ-R= revised version of the Pregnancy-Related Anxiety Questionnaire, and HADS= Hospital Anxiety and Depression Scale
